# Supplementary material for: Myostatin Deficiency Protects C2C12 Cells from Oxidative Stress by Inhibiting Intrinsic Activation of Apoptosis
Source: MDPI journal article supplement (doi:10.3390/cells10071680), 2021-07-03
Supplement: s1 [file s1]

| Antibody                      | Company                   | Type                 | Concentration Catalogue |           |
|-------------------------------|---------------------------|----------------------|-------------------------|-----------|
| GDF-8/11 (H-9)                | Santa Cruz                | Rabbit polyclonal    | 1:50                    | sc-393335 |
| p-p38 MAPK (T180/Y182) (D3F9) | Cell Signaling            | Rabbit monoclonal    | 1:500                   | 4511S     |
| HIF-1 $\alpha$                | Abcam                     | Rabbit monoclonal    | 1:50                    | ab179483  |
| Caspase 3 (H-277)             | Santa Cruz                | Rabbit polyclonal    | 1:50                    | sc-7148   |
| 4- Hydroxynonenal             | Abcam                     | Rabbit polyclonal    | 1:200                   | ab46545   |
| 3- Nitrotyrosine (39B6)       | Santa Cruz                | Mouse monoclonal     | 1:200                   | sc-32757  |
| Endonuclease G (B-2)          | Santa Cruz                | Mouse monoclonal     | 1:200                   | sc-365359 |
| PCNA (PC10)                   | Santa Cruz                | Mouse monoclonal     | 1:100                   | sc-56     |
| p-JNK (G-7)                   | Santa Cruz                | Mouse monoclonal     | 1:100                   | sc-6254   |
| p-MEK-3/6 (B-9)               | Santa Cruz                | Mouse monoclonal     | 1:100                   | sc-8407   |
| Caspase 8 (1.1.40)            | Santa Cruz                | Mouse monoclonal     | 1:100                   | sc-81656  |
| Alexa Fluor 594 anti-rabbit   | Alexa Fluor               | Goat anti rabbit     | 1:1000                  | A11012    |
| Alexa Fluor 488 anti-rabbit   | Alexa Fluor               | Goat anti rabbit     | 1:1000                  | A11008    |
| m- IgGk BP-CFL 488            | Santa Cruz Biotechnologie | IgGk binding protein | 1:200                   | sc-516176 |
